# Supplementary material for: Preparation of a natural deep eutectic solvent mediated self polymerized highly flexible transparent gel having super capacitive behaviour
Source: Royal Society of Chemistry journal article supplement (doi:10.1039/c6ra03309a), 2016-01-01
Supplement: c6ra03309a1.pdf [file c6ra03309a1.pdf]

Electronic supporting information

# Preparation of natural deep eutectic solvent mediated self polymerized highly flexible transparent gel having super capacitive behaviour

Chandrakant Mukesh, Rajeev Gupta, Divesh N. Srivastava, S.K. Nataraj\* and Kamalesh Prasad\*

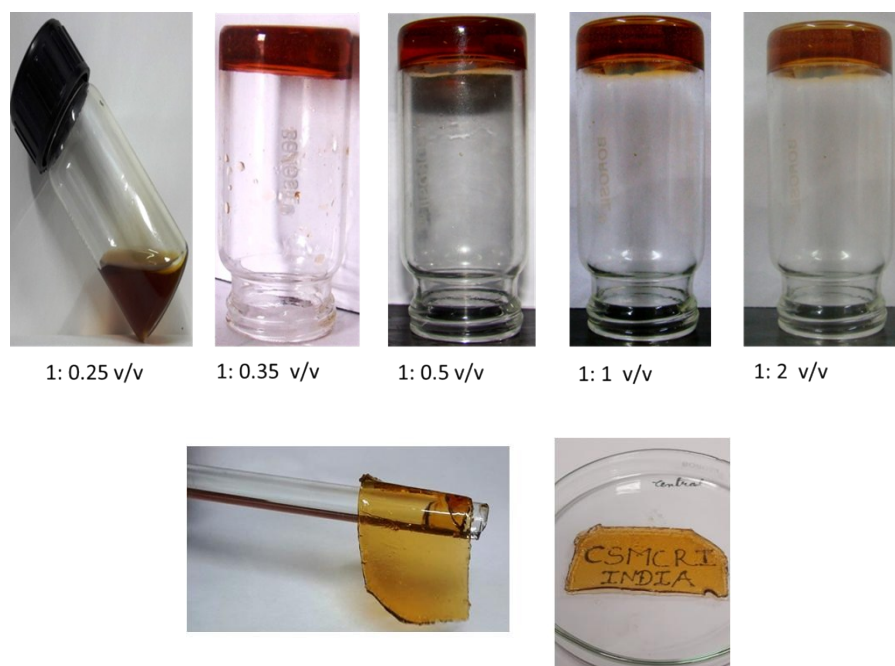

**Figure S1:** Digital photographs of ChoCl.Or 1:1.5 in presence of HEMA in different concentrations and transparent ion gel thus fomed.

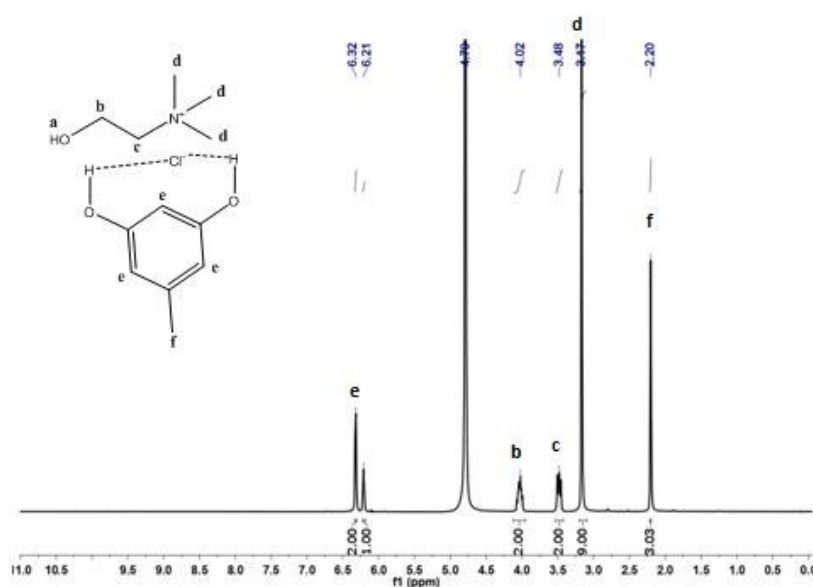

**Figure S2:** <sup>1</sup>H NMR of ChoCl.Or 1:1.5

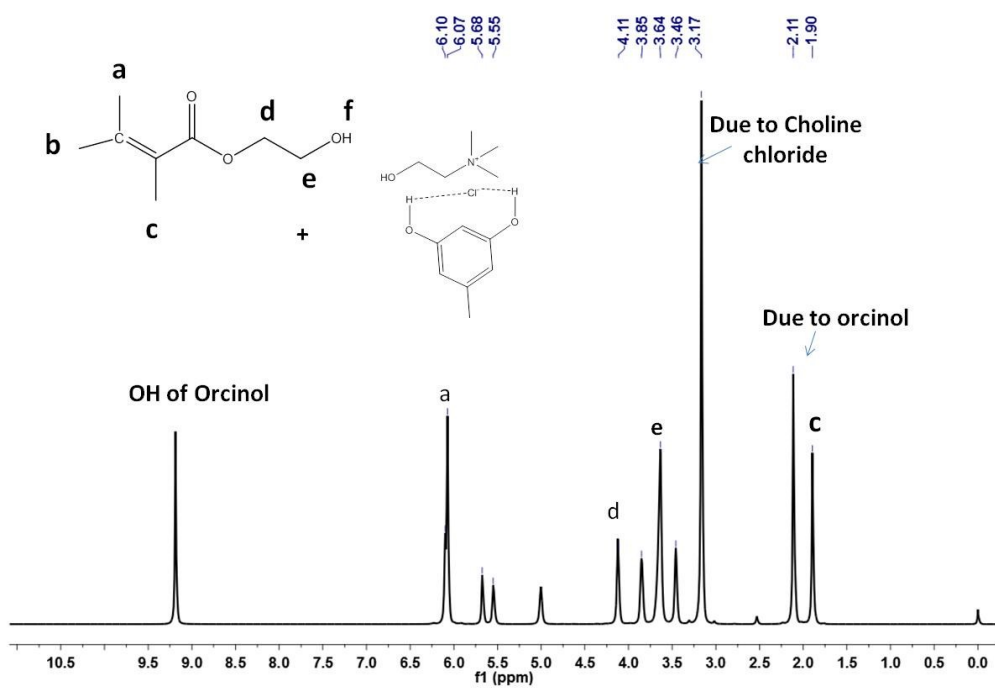

**Figure S3:**  $^1\text{H}$  NMR of HEMA in ChoCl.Or 1:1.5 before polymerization.

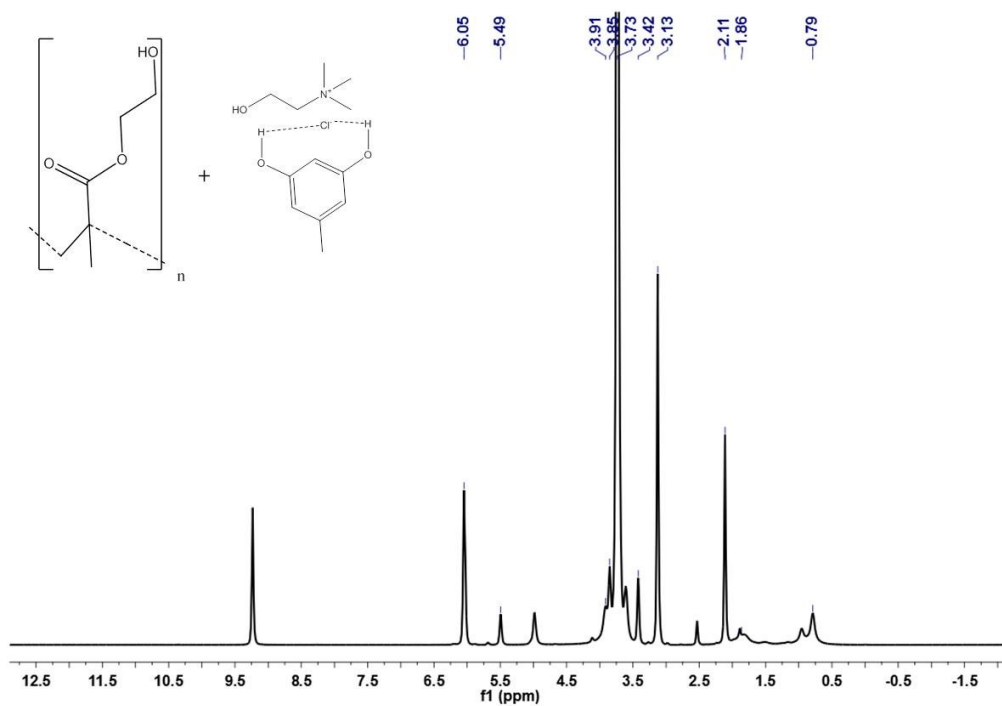

**Figure S4:**  $^1\text{H}$  NMR of HEMA in ChoCl.Or 1:1.5 after polymerization.

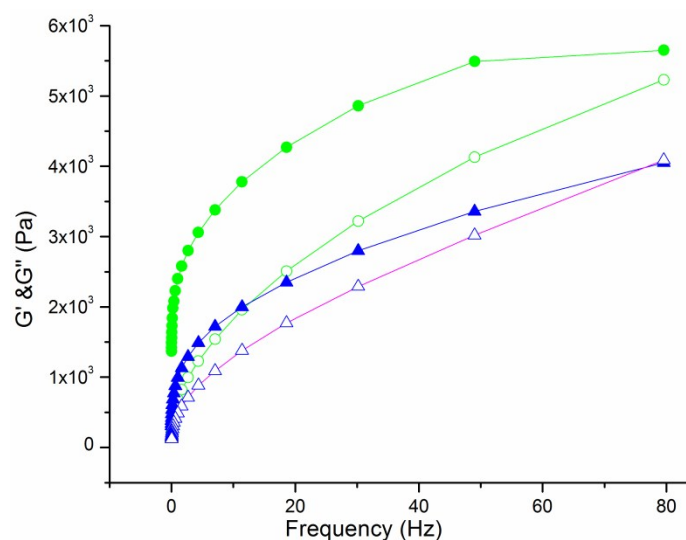

**Figure. S5:** Frequency dependence viscoelastic behavior of HEMA ionogels [closed circles /triangles =  $G'$  and open circles /triangles =  $G''$ ]. Blue colour for Chol.Cl-Or: HEMA (1: 0.35 v/v) and green colour for Chol.Cl-Or: HEMA (1: 0.5 v/v).

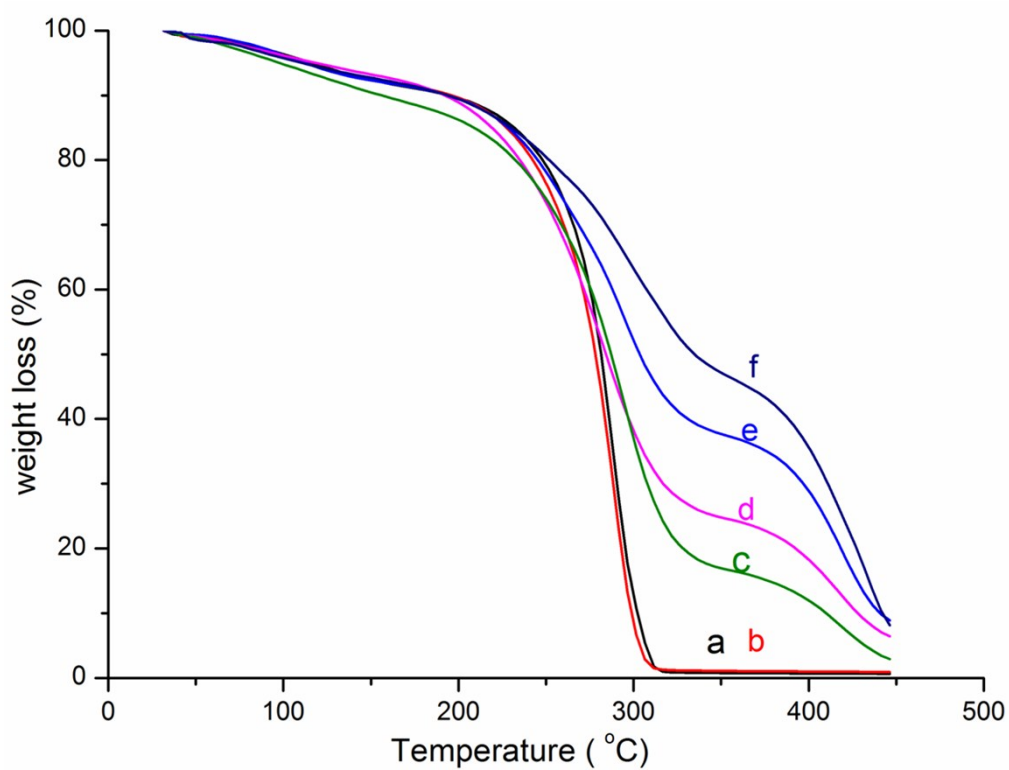

**Figure S6:** TGA of (a) Chol.Cl-Or, (b) unpolymerised Chol.Cl-Or: HEMA 1: 0.25 v/v), (c) polymerised (Chol.Cl-Or: HEMA 1: 0.35 v/v), (d) polymerised (Chol.Cl-Or: HEMA 1: 0.5 v/v), (e) polymerised (Chol.Cl-Or: HEMA 1: 1 v/v), (f) polymerised (Chol.Cl-Or: HEMA 1: 2 v/v).

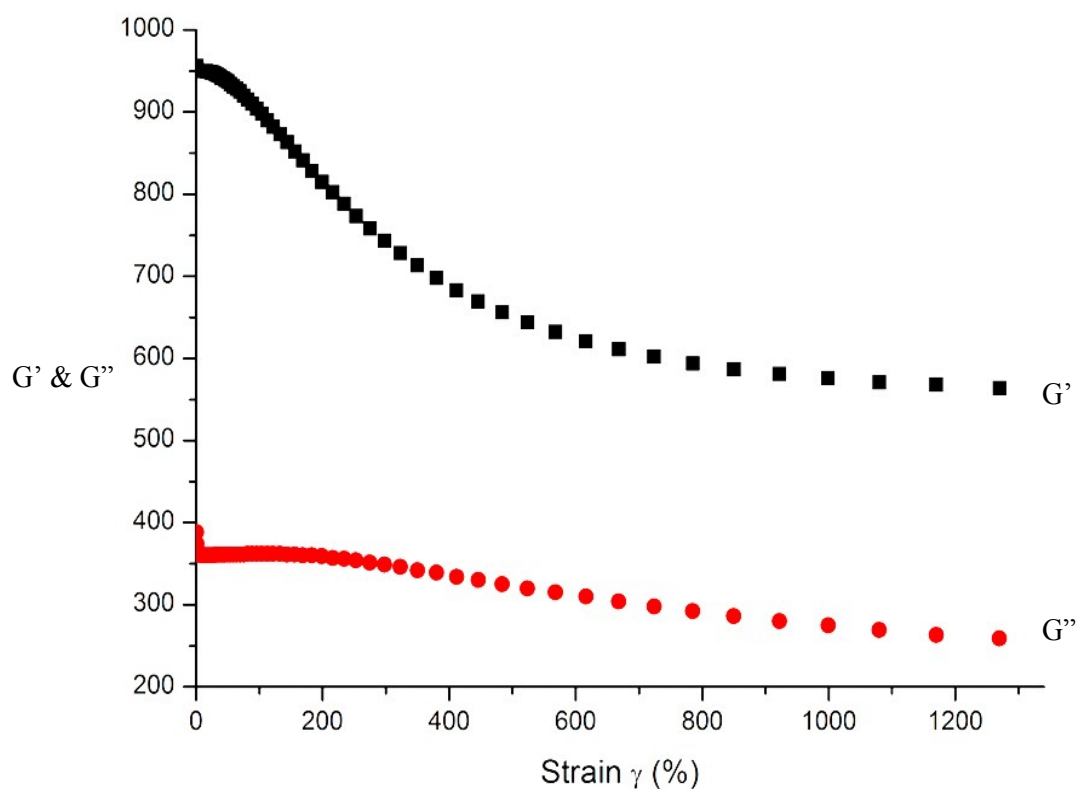

**Figure S7 :**  $G'$  and  $G''$  vs applied strain at constant frequency.

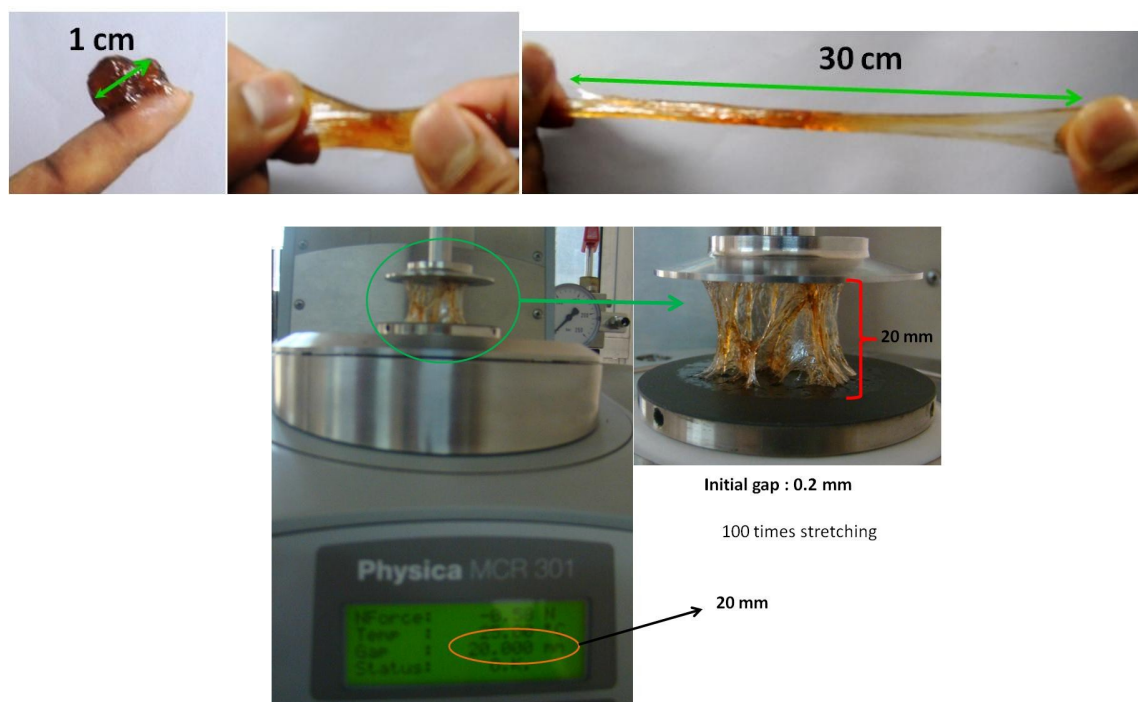

Stretchability of the gel observed during rheological measurements.

**Figure S8 :** Manual stretchability of the HEMA ion gel prepared in ChoCl.Or 1:1.5 at 1:0.35 and stretchability observed during rheological measurements.

**Table S1:** Optimization of mole ratio for NADES preparation

| Choline chloride and orcinol in mole ratio | Observation  | Polymerization of HEMA at room temperature |
|--------------------------------------------|--------------|--------------------------------------------|
| 1: 1                                       | NADES formed | Took place after 24 h                      |
| 1:1.5                                      | NADES formed | Took place within 1.5 h                    |

**Table S2.** Conductivity of ionogel calculated from the impedance measurements.

| Gel Composition          | R <sub>gel</sub> resistance of gel (ohms) | thickness of gel, <i>t</i> (cm) | σ conductivity (mS.cm <sup>-1</sup> ) |
|--------------------------|-------------------------------------------|---------------------------------|---------------------------------------|
| ChoCl.Or : HEMA (1:0.35) | 118.7926                                  | 0.175                           | 1.47                                  |
| ChoCl.Or : HEMA (1:0.5)  | 798.5015                                  | 0.175                           | 0.21                                  |
| ChoCl.Or : HEMA (1:1)    | 703.3494                                  | 0.175                           | 0.24                                  |
| ChoCl.Or : HEMA (1:2)    | 3535.238                                  | 0.175                           | 0.049                                 |
| Pure (ChoCl.Or)          | 65.52                                     | 0.175                           | 2.67                                  |

**Table S3.** Summarised table containing specific capacitance of different ion gels at different scan rates

| 0.35 % (-1 to 1) 100 µg |             | 0.5% (-1 to 1) 100 µg |             | 1% (-1 to 1) 100 µg |             | 0.5 % (-3.5 to 3.5) 1.5 mg |             |
|-------------------------|-------------|-----------------------|-------------|---------------------|-------------|----------------------------|-------------|
| Scan Rate (mV/s)        | Sp. C (F/g) | Scan Rate (mV/s)      | Sp. C (F/g) | Scan Rate (mV/s)    | Sp. C (F/g) | Scan Rate (mV/s)           | Sp. C (F/g) |
| 1                       | 355         | 1                     | 265         | 1                   | 110.5       | -                          | -           |
| 2                       | 198.5       | 2                     | 143.12      | 2                   | 66.6        | -                          | -           |
| 5                       | 86.15       | 5                     | 91.65       | 5                   | 34.4        | -                          | -           |
| 10                      | 44.6        | 10                    | 40.7        | 10                  | 15.82       | -                          | -           |
| 50                      | 11.28       | 50                    | 11.28       | 50                  | 4.03        | 50                         | 7.84        |
| 100                     | 6.12        | 100                   | 6.26        | 100                 | 2.51        | 100                        | 3.77        |
| 200                     | 4.08        | 200                   | 3.22        | 200                 | 1.37        | 200                        | 2.76        |
| 500                     | 1.39        | 500                   | 1.42        | 500                 | 0.64        | 500                        | 1.24        |
